# Supplementary material for: Genome-Wide Identification and Transcriptional Analysis of Arabidopsis DUF506 Gene Family
Source: Int J Mol Sci. 2021 Oct 23;22(21):11442. doi: 10.3390/ijms222111442 (PMC8583954; doi:10.3390/ijms222111442)
Supplement: Supplementary file 1 [file ijms-22-11442-s001.zip]

Archive with 10 entries (10 files):
- Figure S2. Exon-Intron distribution of DUF506 genes in monocots and dicots.jpg
- Supplemental Figures.pdf
- Supplemental Table S1. DUF506 family members in plants.xlsx
- Supplemental Table S2. The number of DUF506 proteins in each group.xlsx
- Supplemental Table S3. The exon number of DUF506 genes in each species.xlsx
- Supplemental Table S4. Synteny analysis of DUF506 genes in monocots.xlsx
- Supplemental Table S5. The occurrence of DUF506 genes in each species.xlsx
- Supplemental Table S6. Putative interactors of DUF506 proteins in Arabidopsis.xlsx
- Supplemental Table S7. Calmodulin binding motifs in AtDUF506.xlsx
- Supplemental Table S8. Primer sequences used in this study.xlsx
