# Supplementary material for: Genome-Wide Identification and Transcriptional Analysis of Arabidopsis DUF506 Gene Family
Source: Int J Mol Sci. 2021 Oct 23;22(21):11442. doi: 10.3390/ijms222111442 (PMC8583954; doi:10.3390/ijms222111442)
Supplement: Supplementary file 1 [file ijms-22-11442-s001.zip › Supplemental Table S1. DUF506 family members in plants.xlsx]

## Sheet: Dicots
Supplemental Table S1. DUF506 family members in plants (Eudicots).
			# of A.A	Mass (kDa)	p.I.	Subcellular localization	Annotation (Phytozome v12.0)
A.thaliana		At1g12030	296	33.66	5.85	cyto	phosphoenolpyruvate carboxylase, putative (DUF506)
		At1g62420	284	32.22	7.46	chlo; cyto	DUF506 family protein (DUF506)
		At1g77145	261	29.93	8.96	nucl	transmembrane protein, putative (DUF506)
		At1g77160	264	30.21	8.26	nucl	hypothetical protein (DUF506)
		At2g20670	295	33.21	6.37	nucl	sugar phosphate exchanger, putative (DUF506)
		At2g38820	311	34.64	8.53	nucl	DNA-directed RNA polymerase subunit beta-beta protein, putative (DUF506)
		At2g39650	292	32.54	6.79	nucl	cruciferin (DUF506)
		At3g07350	299	33.12	5.47	nucl	sulfate/thiosulfate import ATP-binding protein, putative (DUF506)
		At3g22970	371	40.91	5.02	extr	hypothetical protein (DUF506)
		At3g25240	282	31.63	7.61	nucl	sulfate/thiosulfate import ATP-binding protein, putative (DUF506)
		At3g54550	289	32.79	8.63	chlo	DNA-directed RNA polymerase subunit beta-beta protein, putative (DUF506)
		At4g14620	342	38.71	8.28	cyto; cytoplas	hypothetical protein (DUF506)
		At4g32480	288	32.6	7.66	nucl	sugar phosphate exchanger, putative (DUF506)
C.rubella		Carubv10005138m.g	354	39.88	7.38	nucl	PDDEXK-like family of unknown function (PDDEXK_6)
		Carubv10005303m.g	312	35.47	8.76	nucl	EXPRESSED PROTEIN
		Carubv10009904m.g	292	33.16	7.45	cyto	F2401.16
		Carubv10013956m.g	379	41.65	5.4	nucl; cyto; extr	PDDEXK-like family of unknown function (PDDEXK_6)
		Carubv10014278m.g	300	33.24	5.74	chlo; nucl; cyto	F21O3.6 PROTEIN-RELATED
		Carubv10014295m.g	293	33.14	6.31	nucl	EXPRESSED PROTEIN
		Carubv10015467m.g	286	32.25	7.43	chlo	F21O3.6 PROTEIN-RELATED
		Carubv10018656m.g	298	33.13	9.53	chlo	PDDEXK-like family of unknown function (PDDEXK_6)
		Carubv10020728m.g	296	33.92	7.1	chlo; cytoplas	F2401.16
		Carubv10020822m.g	261	30.02	5.35	nucl	PDDEXK-like family of unknown function (PDDEXK_6)
		Carubv10023669m.g	317	35.39	7.78	nucl	PDDEXK-like family of unknown function (PDDEXK_6)
		Carubv10023703m.g	307	34.34	7.22	nucl	PDDEXK-like family of unknown function (PDDEXK_6)
B.rapa		Brara.A01806	300	33.73	7.64	nucl; cyto	EXPRESSED PROTEIN
		Brara.A02057	358	39.85	5.24	nucl	PDDEXK-like family of unknown function (PDDEXK_6)
		Brara.A03612	303	33.88	8.06	nucl	F21O3.6 PROTEIN-RELATED
		Brara.C01976	310	34.63	8.19	nucl	PDDEXK-like family of unknown function (PDDEXK_6)
		Brara.C02023	302	33.58	7.15	nucl	PDDEXK-like family of unknown function (PDDEXK_6)
		Brara.C03900	340	37.51	5.38	cyto; nucl	PDDEXK-like family of unknown function (PDDEXK_6)
		Brara.C03993	283	31.94	7.02	nucl	F21O3.6 PROTEIN-RELATED
		Brara.D02362	301	33.72	8.54	nucl	PDDEXK-like family of unknown function (PDDEXK_6)
		Brara.E01965	368	40.6	5.39	cyto; nucl	PDDEXK-like family of unknown function (PDDEXK_6)
		Brara.E03214	301	33.55	6.91	nucl; chlo	F21O3.6 PROTEIN-RELATED
		Brara.F00881	294	33.74	6.54	cyto	PDDEXK-like family of unknown function (PDDEXK_6)
		Brara.G00022	287	32.15	7.93	nucl; cyto	EXPRESSED PROTEIN
		Brara.G03496	264	30.14	9	nucl	PDDEXK-like family of unknown function (PDDEXK_6)
		Brara.G03497	258	29.63	8.77	nucl	PDDEXK-like family of unknown function (PDDEXK_6)
		Brara.H02677	296	33.77	8.1	cyto; plas	PDDEXK-like family of unknown function (PDDEXK_6)
		Brara.I04689	295	33.25	7.66	nucl	EXPRESSED PROTEIN
		Brara.K00029	296	33.17	7.36	nucl	EXPRESSED PROTEIN
C.sativus (Cucumber)		Cucsa.008080	288	32.56	8.44	chlo	F2401.16
		Cucsa.010840	312	34.75	8.03	nucl	PDDEXK-like family of unknown function (PDDEXK_6)
		Cucsa.016390	369	41.08	6.19	cyto	PDDEXK-like family of unknown function (PDDEXK_6)
		Cucsa.044820	286	32.12	6.94	cyto	F2401.16
		Cucsa.077910	302	34.15	9.37	nucl	F21O3.6 PROTEIN-RELATED
		Cucsa.119160	272	30.76	8.1	cyto	PDDEXK-like family of unknown function (PDDEXK_6)
		Cucsa.126720	286	32.16	8.2	nucl	EXPRESSED PROTEIN
		Cucsa.147590	290	33.01	8.15	nucl	PDDEXK-like family of unknown function (PDDEXK_6)
		Cucsa.150010	275	31.06	5.25	cyto	F21O3.6 PROTEIN-RELATED
		Cucsa.249970	259	30.01	8.13	nucl	PDDEXK-like family of unknown function (PDDEXK_6)
		Cucsa.254760	408	44.68	5.94	cytoplas	PDDEXK-like family of unknown function (PDDEXK_6)
		Cucsa.386700	413	45.37	6.21	nucl; cytoplas	PDDEXK-like family of unknown function (PDDEXK_6)
G.max (Soybean)		Glyma.01G231800	273	31.51	8.1	nucl	PDDEXK-like family of unknown function (PDDEXK_6)
		Glyma.02G001700	367	40.07	6.99	nucl	PDDEXK-like family of unknown function (PDDEXK_6)
		Glyma.02G091500	309	34.55	6.43	nucl	PDDEXK-like family of unknown function (PDDEXK_6)
		Glyma.02G143100	360	40.29	7.38	nucl	PDDEXK-like family of unknown function (PDDEXK_6)
		Glyma.05G190100	273	30.26	6.04	nucl	PDDEXK-like family of unknown function (PDDEXK_6)
		Glyma.07G197100	323	36.67	7.91	mito	EXPRESSED PROTEIN
		Glyma.07G265000	298	33.84	5.03	chlo	F2401.16
		Glyma.08G147700	266	29.52	6.09	nucl	PDDEXK-like family of unknown function (PDDEXK_6)
		Glyma.08G346100	286	31.54	7.19	nucl	F21O3.6 PROTEIN-RELATED
		Glyma.09G009700	337	38.54	7.89	chlo	F2401.16
		Glyma.09G092300	152	17.23	10.42	cyto	F2401.16
		Glyma.10G002100	384	41.7	5.28	nucl	PDDEXK-like family of unknown function (PDDEXK_6)
		Glyma.10G031300	340	38.09	8.47	cyto	PDDEXK-like family of unknown function (PDDEXK_6)
		Glyma.10G179100	388	42.31	6.17	chlo	PDDEXK-like family of unknown function (PDDEXK_6)
		Glyma.11G014700	276	31.87	8.67	nucl	PDDEXK-like family of unknown function (PDDEXK_6)
		Glyma.12G114200	288	32.86	7.26	nucl	PDDEXK-like family of unknown function (PDDEXK_6)
		Glyma.13G179200	330	37.5	6.97	nucl	EXPRESSED PROTEIN
		Glyma.13G238500	303	34.73	7.86	nucl	EXPRESSED PROTEIN
		Glyma.15G074800	301	34.23	8.36	mito	EXPRESSED PROTEIN
		Glyma.15G114000	313	35.66	6.39	chlo	F2401.16
		Glyma.16G085600	300	33.6	6.6	nucl	F21O3.6 PROTEIN-RELATED
		Glyma.18G291600	309	34.59	6.57	nucl	PDDEXK-like family of unknown function (PDDEXK_6)
		Glyma.19G160600	362	40.64	7.85	cyto	PDDEXK-like family of unknown function (PDDEXK_6)
		Glyma.20G211100	394	42.86	6.17	chlo	PDDEXK-like family of unknown function (PDDEXK_6)
P.vulgaris (Common bean)		Phvul.001G155900	359	39.89	8.52	chlo	PDDEXK-like family of unknown function (PDDEXK_6)
		Phvul.002G035300	262	30.47	6.4	nucl	PDDEXK-like family of unknown function (PDDEXK_6)
		Phvul.002G270700	273	30.3	6.1	nucl	PDDEXK-like family of unknown function (PDDEXK_6)
		Phvul.003G083200	294	33.89	4.82	chlo	F2401.16
		Phvul.005G103100	293	33.87	7.6	nucl	PDDEXK-like family of unknown function (PDDEXK_6)
		Phvul.006G143800	312	35.55	6.19	chlo	F2401.16
		Phvul.006G184800	305	34.46	7.66	mito	EXPRESSED PROTEIN
		Phvul.007G110800	392	42.99	5.24	nucl	PDDEXK-like family of unknown function (PDDEXK_6)
		Phvul.007G176100	356	39.83	8.13	nucl	PDDEXK-like family of unknown function (PDDEXK_6)
		Phvul.007G279300	369	40.46	7.63	nucl	PDDEXK-like family of unknown function (PDDEXK_6)
		Phvul.008G010300	312	34.94	6.78	nucl	PDDEXK-like family of unknown function (PDDEXK_6)
		Phvul.008G134000	290	32.35	6.36	nucl	F21O3.6 PROTEIN-RELATED
		Phvul.010G025800	300	33.55	7.42	nucl	F21O3.6 PROTEIN-RELATED
		Phvul.011G119300	287	32.9	8.2	nucl	PDDEXK-like family of unknown function (PDDEXK_6)
M.truncatula		Medtr1g041155	358	39.84	5.65	nucl	PDDEXK-like family of unknown function (PDDEXK_6)
		Medtr1g070970	352	39.63	8.02	chlo	PDDEXK-like family of unknown function (PDDEXK_6)
		Medtr1g076500	385	42.43	7.22	chlo	PDDEXK-like family of unknown function (PDDEXK_6)
		Medtr2g013780	318	35.87	7.86	nucl	EXPRESSED PROTEIN
		Medtr2g013880	321	36.59	6.9	mito	EXPRESSED PROTEIN
		Medtr2g025520	322	36.14	6.09	nucl	F2401.16
		Medtr4g078310	291	32.9	6.31	chlo	PDDEXK-like family of unknown function (PDDEXK_6)
		Medtr4g088760	377	43.55	8.26	chlo	EXPRESSED PROTEIN
		Medtr4g088770	325	37.25	6.97	nucl	EXPRESSED PROTEIN
		Medtr4g132940	285	32.96	7.92	cyto	F2401.16
		Medtr4g132963	285	32.96	7.92	cyto	F2401.16
		Medtr4g132970	306	35.22	6.79	cyto	F2401.16
		Medtr5g008720	251	28.91	6.61	nucl	PDDEXK-like family of unknown function (PDDEXK_6)
		Medtr7g053310	290	32.74	9.46	cyto	F21O3.6 PROTEIN-RELATED
		Medtr7g083080	327	36.67	6.08	nucl	PDDEXK-like family of unknown function (PDDEXK_6)
		Medtr7g095960	357	40.19	8.76	nucl	PDDEXK-like family of unknown function (PDDEXK_6)
		Medtr8g012240	306	34.13	7.85	nucl	F21O3.6 PROTEIN-RELATED
		Medtr8g093440	271	30.42	7.2	cyto	PDDEXK-like family of unknown function (PDDEXK_6)
R.communis (Castor)		27985.t000031	249	28.42	5.21	nucl	conserved hypothetical protein
		29070.t000009	285	32.66	8.55	nucl	conserved hypothetical protein
		29842.t000008	306	34.86	7.63	cyto	conserved hypothetical protein
		29844.t000039	393	43.57	5.59	nucl	conserved hypothetical protein
		29883.t000037	364	41.18	5.88	nucl	conserved hypothetical protein
		29938.t000024	215	24.86	10.1	nucl	conserved hypothetical protein
		29983.t000079	292	33.52	7.36	nucl	conserved hypothetical protein
		30003.t000023	307	34.5	6.94	nucl	conserved hypothetical protein
		30136.t000020	258	28.87	8.27	nucl	conserved hypothetical protein
		30178.t000005	286	32.12	7.78	nucl	conserved hypothetical protein
		30190.t000112	308	34.79	6.26	nucl	conserved hypothetical protein
V.vinifera (Grape vine)		GSVIVG01003141001	398	44.65	7.3	nucl	PDDEXK-like family of unknown function (PDDEXK_6)
		GSVIVG01005210001	276	30.98	7.88	nucl	EXPRESSED PROTEIN
		GSVIVG01006248001	283	31.26	9.25	chlo	F21O3.6 PROTEIN-RELATED
		GSVIVG01010039001	277	30.47	8.27	nucl	PDDEXK-like family of unknown function (PDDEXK_6)
		GSVIVG01016558001	273	31	7.22	nucl	PDDEXK-like family of unknown function (PDDEXK_6)
		GSVIVG01018080001	366	40.86	5.6	nucl	PDDEXK-like family of unknown function (PDDEXK_6)
		GSVIVG01020560001	304	33.63	7.61	chlo	PDDEXK-like family of unknown function (PDDEXK_6)
		GSVIVG01026527001	272	29.98	8.37	nucl	PDDEXK-like family of unknown function (PDDEXK_6)
		GSVIVG01030534001	184	20.73	10.06	chlo	F2401.16
		GSVIVG01036397001	269	31.06	6.63	nucl	PDDEXK-like family of unknown function (PDDEXK_6)
D.carota (Carrot)		DCAR_002219	282	32.14	6.31	chlo	hypothetical protein
		DCAR_004073	305	34.56	7.89	chlo; mito	hypothetical protein
		DCAR_008038	307	34.53	8.21	chlo	hypothetical protein
		DCAR_012511	413	45.7	4.74	nucl	hypothetical protein
		DCAR_012686	301	34.14	8.53	nucl	hypothetical protein
		DCAR_018441	330	36.01	8.02	chlo	hypothetical protein
		DCAR_018631	290	32.87	8.67	nucl	hypothetical protein
		DCAR_021250	312	35.17	8.14	cyto	hypothetical protein
		DCAR_027260	378	42.24	6.04	nucl; chlo	hypothetical protein
		DCAR_027618	295	33.34	8.07	nucl	hypothetical protein
		DCAR_030701	372	41.83	5.92	cytoplas	hypothetical protein
		DCAR_030875	307	34.45	7.7	nucl	hypothetical protein
S.lycopersicum (Tomato)		Solyc02g078150.2	309	35.3	7.03	chlo; nucl	PDDEXK-like family of unknown function (PDDEXK_6)
		Solyc02g078160.2	303	34.27	7.76	mito	PDDEXK-like family of unknown function (PDDEXK_6)
		Solyc03g006410.2	305	34.99	6.62	mito	EXPRESSED PROTEIN
		Solyc06g005480.2	313	34.14	7.63	chlo	PDDEXK-like family of unknown function (PDDEXK_6)
		Solyc06g007580.1	300	33.5	7.82	nucl	F21O3.6 PROTEIN-RELATED
		Solyc06g053910.2	390	43.28	5.44	chlo	PDDEXK-like family of unknown function (PDDEXK_6)
		Solyc06g054640.1	223	25.69	5.39	nucl	PDDEXK-like family of unknown function (PDDEXK_6)
		Solyc06g083160.1	294	33.11	8.58	nucl	F21O3.6 PROTEIN-RELATED
		Solyc07g053900.2	321	36.95	8.4	nucl	PDDEXK-like family of unknown function (PDDEXK_6)
		Solyc09g065760.2	436	48.41	6.33	nucl; cyto	PDDEXK-like family of unknown function (PDDEXK_6)
		Solyc09g082980.2	399	44.12	6.76	nucl	PDDEXK-like family of unknown function (PDDEXK_6)
		Solyc11g012120.1	298	33.66	7.25	chlo; nucl	F2401.16
		Solyc11g042630.1	285	32.29	8.31	cyto	PDDEXK-like family of unknown function (PDDEXK_6)

## Sheet: Monocots
Supplemental Table S1. DUF506 family members in plants (Monocots).
			# of A.A	Mass (kDa)	p.I.	Subcellular localization	Annotation (Phytozome v12.0)
O.sativa (Rice)		LOC_Os01g54340	270	29.87	7.79	nucl	plant-specific domain TIGR01615 family protein, expressed
		LOC_Os01g65740	264	29.2	11.08	nucl	plant-specific domain TIGR01615 family protein, expressed
		LOC_Os01g68650	294	30.43	9.04	chlo	plant-specific domain TIGR01615 family protein, expressed
		LOC_Os01g74250	338	37.62	7.74	chlo	plant-specific domain TIGR01615 family protein, expressed
		LOC_Os02g48850	288	30.91	8.05	nucl	plant-specific domain TIGR01615 family protein, expressed
		LOC_Os03g06680	308	33.01	7.15	chlo	plant-specific domain TIGR01615 family protein, expressed
		LOC_Os03g58230	406	43.74	9.37	chlo	plant-specific domain TIGR01615 family protein, expressed
		LOC_Os05g44300	307	32.17	7.13	nucl	plant-specific domain TIGR01615 family protein, expressed
		LOC_Os10g28210	302	32.04	7	chlo	plant-specific domain TIGR01615 family protein, expressed
		LOC_Os11g25020	287	30.21	9.11	chlo	plant-specific domain TIGR01615 family protein, expressed
		LOC_Os11g25040	307	32.47	5.51	chlo	plant-specific domain TIGR01615 family protein, expressed
B.distachyon		Bradi1g05500	377	39.96	8.78	chlo	PDDEXK-like family of unknown function (PDDEXK_6)
		Bradi1g55480	374	40.24	8.37	chlo	PDDEXK-like family of unknown function (PDDEXK_6)
		Bradi1g74270	307	32.87	6.38	chlo	PDDEXK-like family of unknown function (PDDEXK_6)
		Bradi2g49690	277	30.07	6.77	nucl	PDDEXK-like family of unknown function (PDDEXK_6)
		Bradi2g56800	241	27.1	7.93	nucl	PDDEXK-like family of unknown function (PDDEXK_6)
		Bradi2g58590	300	30.68	9.13	nucl	PDDEXK-like family of unknown function (PDDEXK_6)
		Bradi2g62310	345	37.77	8.16	chlo	PDDEXK-like family of unknown function (PDDEXK_6)
		Bradi3g26870	300	32.44	7.56	chlo	PDDEXK-like family of unknown function (PDDEXK_6)
		Bradi3g53601	329	34.84	8.45	chlo	F2401.16
H.vulgare (Barley)		HORVU1Hr1G076120	282	30.09	7.75	nucl	HORVU1Hr1G076120.1
		HORVU3Hr1G071220	263	28.92	7.44	nucl	HORVU3Hr1G071220.1
		HORVU3Hr1G091440	244	26.76	8.33	nucl	HORVU3Hr1G091440.2
		HORVU3Hr1G093260	406	43.16	10.41	nucl	HORVU3Hr1G093260.1
		HORVU3Hr1G115940	424	46.69	9.33	nucl	HORVU3Hr1G115940.1
		HORVU4Hr1G054810	294	31.36	8.46	chlo	HORVU4Hr1G054810.1
		HORVU4Hr1G073730	316	33.57	7.84	pero	HORVU4Hr1G073730.1
		HORVU5Hr1G105950	375	39.56	9	chlo	HORVU5Hr1G105950.3
		HORVU6Hr1G071100	317	33.34	8.7	chlo	HORVU6Hr1G071100.1
S.bicolor (Sorghum)		Sobic.001G057100	394	42.37	8.84	chlo	Sobic.001G057100.1.p
		Sobic.001G247400	294	31.47	6.78	chlo	Sobic.001G247400.1.p
		Sobic.001G495600	300	32.06	7.86	chlo	Sobic.001G495600.1.p
		Sobic.002G055400	475	50.45	8.9	chlo	PDDEXK-like family of unknown function (PDDEXK_6)
		Sobic.003G293900	283	31.06	8.07	cyto	Sobic.003G293900.1.p
		Sobic.003G376600	282	30.88	9.41	nucl	PDDEXK-like family of unknown function (PDDEXK_6)
		Sobic.003G400200	297	30.88	8.86	nucl	Sobic.003G400200.1.p
		Sobic.004G258500	310	33.11	7.5	chlo	Sobic.004G258500.1.p
		Sobic.009G200900	302	31.96	8.28	nucl	Sobic.009G200900.1.p
Z.mays (Maize)		GRMZM2G018992	402	42.56	9.01	chlo	PDDEXK-like family of unknown function (PDDEXK_6)
		GRMZM2G030350	384	40.77	8.48	chlo	PDDEXK-like family of unknown function (PDDEXK_6)
		GRMZM2G030688	289	29.46	9.13	nucl	PDDEXK-like family of unknown function (PDDEXK_6)
		GRMZM2G045779	345	37.72	8.79	chlo	PDDEXK-like family of unknown function (PDDEXK_6)
		GRMZM2G069694	285	31.26	6.66	nucl	PDDEXK-like family of unknown function (PDDEXK_6)
		GRMZM2G080034	406	42.95	8.49	chlo	PDDEXK-like family of unknown function (PDDEXK_6)
		GRMZM2G105522	315	33.02	9.32	nucl	F2401.16
		GRMZM2G110681	301	32.36	6.51	chlo	PDDEXK-like family of unknown function (PDDEXK_6)
		GRMZM2G136081	301	32	8.14	chlo	PDDEXK-like family of unknown function (PDDEXK_6)
		GRMZM2G166548	295	30.19	8.95	cyto	PDDEXK-like family of unknown function (PDDEXK_6)
		GRMZM2G480551	214	22.64	10.96	nucl	PDDEXK-like family of unknown function (PDDEXK_6)
