# Supplementary material for: Genome-Wide Identification and Transcriptional Analysis of Arabidopsis DUF506 Gene Family
Source: Int J Mol Sci. 2021 Oct 23;22(21):11442. doi: 10.3390/ijms222111442 (PMC8583954; doi:10.3390/ijms222111442)
Supplement: Supplementary file 1 [file ijms-22-11442-s001.zip › Supplemental Table S2. The number of DUF506 proteins in each group.xlsx]

## Sheet: Sheet1
	Table S2. The number of DUF506 proteins in each group.
		Organism	Subgroup
			I	II	IIIa	IIIb
	Monocots	O.sativa	5	2	1	3
		B.distachyon	3	1	1	4
		H.vulgare	4	2	1	2
		S.bicolor	3	2	0	4
		Z.mays	4	1	1	5
	Eudicots	A.thaliana	4	2	3	4
		C.rubella	4	2	2	4
		B.rapa	5	4	3	5
		C.sativus	4	3	2	3
		G.max	6	7	4	7
		P.vulgaris	4	4	2	4
		M.truncatula	6	6	2	4
		R.communis	3	3	3	2
		V.vinifera	2	3	3	2
		D.carota	4	3	1	4
		S.lycopersicum	3	5	2	3
	Basal angiosperm	A. trichopoda	2	1	2	1
