# Supplementary material for: Genome-Wide Identification and Transcriptional Analysis of Arabidopsis DUF506 Gene Family
Source: Int J Mol Sci. 2021 Oct 23;22(21):11442. doi: 10.3390/ijms222111442 (PMC8583954; doi:10.3390/ijms222111442)
Supplement: Supplementary file 1 [file ijms-22-11442-s001.zip › Supplemental Table S3. The exon number of DUF506 genes in each species.xlsx]

## Sheet: Sheet1
	Supplemental Table S3. The exon number of DUF506 genes in each species
		Organism	Number of Exon
			1	2	3	4	5
	Monocots	O.sativa	4	2	4	1	0
		B.distachyon	1	4	4	0	0
		H.vulgare	2	3	4	0	0
		S.bicolor	1	3	3	2	0
		Z.mays	2	6	3	0	0
	Eudicots	A.thaliana	2	2	9	0	0
		C.rubella	2	2	8	0	0
		B.rapa	3	4	9	1	0
		C.sativus	1	3	7	1	0
		G.max	2	4	18	0	0
		P.vulgaris	2	2	10	0	0
		M.truncatula	2	4	12	0	0
		R.communis	2	1	8	0	0
		V.vinifera	1	1	7	0	1
		D.carota	2	1	9	0	0
		S.lycopersicum	2	3	7	1	0
