# Supplementary material for: Genome-Wide Identification and Transcriptional Analysis of Arabidopsis DUF506 Gene Family
Source: Int J Mol Sci. 2021 Oct 23;22(21):11442. doi: 10.3390/ijms222111442 (PMC8583954; doi:10.3390/ijms222111442)
Supplement: Supplementary file 1 [file ijms-22-11442-s001.zip › Supplemental Table S4. Synteny analysis of DUF506 genes in monocots.xlsx]

## Sheet: Sheet1
	Supplemental Table S4. Synteny analysis of DUF506 genes in monocots
	Species	Duplicated gene pairs	Ka	Ks	Ka/Ks	Duplication type	Type of selection
	B.distachyon	Bradi1g74270/Bradi3g26870	0.23	0.6	0.383333	Segmental	Purify selection
	O.sativa	LOC_Os01g54340/LOC_Os05g44300	0.19	0.36	0.527778	Segmental	Purify selection
	Z.mays	GRMZM2G018992/GRMZM2G030350	0.1	0.14	0.714286	Segmental	Purify selection
		GRMZM2G110681/GRMZM2G136081	0.14	0.54	0.259259	Segmental	Purify selection
		GRMZM2G030688/GRMZM2G030688	0.07	0.18	0.388889	Segmental	Purify selection
	S.bicolor	Sobic.001G247400/Sobic.001G495600	0.15	0.6	0.25	Segmental	Purify selection
		Sobic.003G293900/Sobic.009G200900	0.23	0.42	0.547619	Segmental	Purify selection
