# Supplementary material for: Genome-Wide Identification and Transcriptional Analysis of Arabidopsis DUF506 Gene Family
Source: Int J Mol Sci. 2021 Oct 23;22(21):11442. doi: 10.3390/ijms222111442 (PMC8583954; doi:10.3390/ijms222111442)
Supplement: Supplementary file 1 [file ijms-22-11442-s001.zip › Supplemental Table S5. The occurrence of DUF506 genes in each species.xlsx]

## Sheet: Sheet1
	Supplemental Table S5. The occurrence of DUF506 genes in each species
		Genome size (Mb)	Protein coding loci	# of DUF506	DUF506‰
	V.carteri	131	14247	0	--
	C. reinhardtii	111	17741	1	0.0563666
	M.polymorpha	226	19287	3	0.155545
	P.patens	473	32926	20	0.607423
	S.moellendorffii	213	22273	13	0.583666
	P.abies	19600	91045	18	0.197704
	A.trichopoda	706	26846	6	0.223497
	A.thaliana	135	27655	13	0.470078
	C.rubella	135	26521	12	0.452472
	B.rapa	284	40492	17	0.419836
	C.sativus (Cucumber)	203	21491	12	0.558373
	G.max (Soybean)	978	56044	24	0.428235
	P.vulgaris (Common bean)	537	27433	14	0.510334
	M.truncatula	360	50894	18	0.353676
	R.communis (Castor)	400	31221	11	0.352327
	V.vinifera (Grape vine)	487	26346	10	0.379564
	D.carota (Carrot)	421	32113	12	0.37368
	S.lycopersicum (Tomato)	900	34727	13	0.374348
	O.sativa (Rice)	372	42189	11	0.260731
	B.distachyon	272	34310	9	0.262314
	H.vulgare (Barley)	4600	39734	9	0.226506
	S.bicolor (Sorghum)	732	34129	9	0.263705
	Z.mays (Maize)	2450	40557	11	0.271223
