# Supplementary material for: Genome-Wide Identification and Transcriptional Analysis of Arabidopsis DUF506 Gene Family
Source: Int J Mol Sci. 2021 Oct 23;22(21):11442. doi: 10.3390/ijms222111442 (PMC8583954; doi:10.3390/ijms222111442)
Supplement: Supplementary file 1 [file ijms-22-11442-s001.zip › Supplemental Table S6. Putative interactors of DUF506 proteins in Arabidopsis.xlsx]

## Sheet: STRING
Supplemental Table S6. Putative interactors of DUF506 proteins in Arabidopsis
Bait	Prey	Score	TAIR10 annotation
At1g12030	At3g61930	0.74	Uncharacterized protein At3g61930/F21F14_100; Unknown protein; Its function is described as molecular_function unknown; Involved in N-terminal protein myristoylation; Expressed in 11 plant structures; Expressed during 4 anthesis, C globular stage, petal differentiation and expansion stage; Has 11 Blast hits to 11 proteins in 5 species: Archae - 0; Bacteria - 0; Metazoa - 0; Fungi - 0; Plants - 11…
	At5g05250	0.731	AT5g05250/K18I23_5; Unknown protein; BEST Arabidopsis thaliana protein match is: unknown protein (TAIR:AT3G56360.1); Has 30201 Blast hits to 17322 proteins in 780 species: Archae - 12; Bacteria - 1396; Metazoa - 17338; Fungi - 3422; Plants - 5037; Viruses - 0; Other Eukaryotes - 2996 (source: NCBI BLink)
	At1g47400	0.677	FE-UPTAKE-INDUCING PEPTIDE3, FEP3, IMA1, IRONMAN 1, Involved in regulation of iron deficiency response genes. Overexpression results in hyperaccumulation of Fe and Mn.
	At5g38820	0.668	Encodes a putative amino acid transporter
	At5g67370/CGLD27	0.652	Protein CONSERVED IN THE GREEN LINEAGE AND DIATOMS 27, chloroplastic; Required for growth in low iron conditions
	At3g07720	0.624	Galactose oxidase/kelch repeat superfamily protein; Contains the following InterPro domains: Galactose oxidase/kelch, beta-propeller (InterPro:IPR011043), Kelch repeat type 1 (InterPro:IPR006652), Kelch-type beta propeller (InterPro:IPR015915); BEST Arabidopsis thaliana protein match is: nitrile specifier protein 5 (TAIR:AT5G48180.1); Has 10920 Blast hits to 5857 proteins in 349 species: Archae -…
	At1g34760/GRF11/RHS5	0.623	GENERAL REGULATORY FACTOR 11, GRF11, RHS5, ROOT HAIR SPECIFIC 5; 14-3-3-like protein GF14 omicron; Is associated with a DNA binding complex that binds to the G box, a well-characterized cis-acting DNA regulatory element found in plant genes
	At5g03570/IREG2/FPN2	0.612	FERROPORTIN 2, FPN2, IREG2, IRON REGULATED 2; Solute carrier family 40 member 2; Encodes FPN2, a tonoplast localized nickel transport protein. FPN2 is one of the Arabidopsis orthologs (AT2G38460/IREG1/FPN1 and AT5G03570/IREG2/FPN2) the iron efflux transporter ferroportin (FPN) identified in animals
	At1g56430/NAS4	0.6	Probable nicotianamine synthase 4; Synthesizes nicotianamine, a polyamine which serves as a sensor for the physiological iron status within the plant, and/or might be involved in the transport of iron
	At2g37130	0.583	Peroxidase superfamily protein; Removal of H(2)O(2), oxidation of toxic reductants, biosynthesis and degradation of lignin, suberization, auxin catabolism, response to environmental stresses such as wounding, pathogen attack and oxidative stress. These functions might be dependent on each isozyme/isoform in each plant tissue; Belongs to the peroxidase family. Classical plant (class III) peroxidas…
At1g62420	At2g37130	0.534	Peroxidase superfamily protein; Removal of H(2)O(2), oxidation of toxic reductants, biosynthesis and degradation of lignin, suberization, auxin catabolism, response to environmental stresses such as wounding, pathogen attack and oxidative stress. These functions might be dependent on each isozyme/isoform in each plant tissue; Belongs to the peroxidase family. Classical plant (class III) peroxidas…
	At5g12340	0.491	Uncharacterized protein At5g12340; Unknown protein; BEST Arabidopsis thaliana protein match is: unknown protein (TAIR:AT1G28190.1); Has 30201 Blast hits to 17322 proteins in 780 species: Archae - 12; Bacteria - 1396; Metazoa - 17338; Fungi - 3422; Plants - 5037; Viruses - 0; Other Eukaryotes - 2996 (source: NCBI BLink)
	At3g09220/LAC7	0.416	Laccase-7; Putative laccase, a member of laccase family of genes (17 members in Arabidopsis)
At2g20670	At5g22920/CHYR1/RZPF34	0.925	CHY ZINC-FINGER AND RING PROTEIN 1, CHYR1, RING ZINC-FINGER PROTEIN 34, RZPF34; Loss of function mutations show reduced (15%) stomatal aperture under non stress conditions. CHY-type/CTCHY-type/RING-type Zinc finger protein; Possesses E3 ubiquitin-protein ligase activity in vitro. Mediates mainly 'Lys-48'-linked polyubiquitination. Promotes abscisic acid (ABA)-induced stomatal closure, reactive ox…
	At1g80440/KFB20/KMD1	0.896	KELCH REPEAT F-BOX 20, KFB20, KISS ME DEADLY 1, KMD1; Encodes a member of a family of F-box proteins, called the KISS ME DEADLY (KMD) family, that targets type-B ARR proteins for degradation and is involved in the negative regulation of the cytokinin response. Also named as KFB20, a member of a group of Kelch repeat F-box proteins that negatively regulate phenylpropanoid biosynthesis by targeting…
	At5g19120	0.853	Eukaryotic aspartyl protease family protein; Its function is described as aspartic-type endopeptidase activity; Involved in proteolysis; Located in endomembrane system; Expressed in 24 plant structures; Expressed during 13 growth stages; Contains the following InterPro domains: Peptidase aspartic (InterPro:IPR021109), Peptidase aspartic, catalytic (InterPro:IPR009007), Peptidase A1 (InterPro:IPR0…
	At1g70290/TPS8	0.833	TPS8, TREHALOSE-6-PHOSPHATASE SYNTHASE S8; Probable alpha,alpha-trehalose-phosphate synthase [UDP-forming] 8; Encodes an enzyme putatively involved in trehalose biosynthesis. Though the protein has both trehalose-6-phosphate synthase (TPS)-like and trehalose-6-phosphate phosphatase (TPP)-like domains, neither activity has been detected in enzymatic assays nor has the protein been able to compleme…
	At4g37610/BT5	0.832	BTB/POZ and TAZ domain-containing protein 5; May act as a substrate-specific adapter of an E3 ubiquitin-protein ligase complex (CUL3-RBX1-BTB) which mediates the ubiquitination and subsequent proteasomal degradation of target proteins
	At1g25400	0.808	transmembrane protein; Uncharacterized protein F2J7.13; Unknown protein; BEST Arabidopsis thaliana protein match is: unknown protein (TAIR:AT1G68440.1); Has 21 Blast hits to 21 proteins in 6 species: Archae - 0; Bacteria - 0; Metazoa - 0; Fungi - 0; Plants - 21; Viruses - 0; Other Eukaryotes - 0 (source: NCBI BLink)
	At2g44500	0.795	O-fucosyltransferase family protein; May play a role in the biosynthesis of matrix polysaccharides and contribute to the biomechanics and development of the plant cell wall
	At1g76600	0.795	poly polymerase; Uncharacterized protein At1g76600; Unknown protein; Its function is described as molecular_function unknown; Involved in N-terminal protein myristoylation; Located in nucleolus, nucleus; Expressed in 24 plant structures; Expressed during 15 growth stages; BEST Arabidopsis thaliana protein match is: unknown protein (TAIR:AT1G21010.1); Has 220 Blast hits to 220 proteins in 14 speci…
	At5g06790	0.779	cotton fiber protein; Uncharacterized protein At5g06790; Unknown protein; Its function is described as molecular_function unknown; Involved in biological_process unknown; Located in chloroplast; Expressed in 9 plant structures; Expressed during LP.04 four leaves visible, LP.02 two leaves visible, petal differentiation and expansion stage, D bilateral stage; BEST Arabidopsis thaliana protein match…
	At4g19430	0.779	Uncharacterized protein At4g19430; Unknown protein; Its function is described as molecular_function unknown; Involved in biological_process unknown; Located in chloroplast; Expressed in 17 plant structures; Expressed during 13 growth stages; Has 30201 Blast hits to 17322 proteins in 780 species: Archae - 12; Bacteria - 1396; Metazoa - 17338; Fungi - 3422; Plants - 5037; Viruses - 0; Other Eukaryo…
At2g38820	At2g18700/TPS11	0.475	TREHALOSE-6-PHOSPHATE SYNTHASE 11; Probable alpha,alpha-trehalose-phosphate synthase [UDP-forming] 11; Encodes an enzyme putatively involved in trehalose biosynthesis. The protein has a trehalose synthase (TPS)-like domain that may or may not be active as well as a trehalose phosphatase (TPP)-like domain
	At2g25900/ATCTH/TZF1	0.446	A. THALIANA TANDEM ZINC FINGER PROTEIN 1, ATCTH, ATTZF1, TANDEM ZINC FINGER 1, TZF1; Encodes a protein with two tandem-arrayed CCCH-type zinc fingers that binds RNA and is involved in RNA turnover. The mRNA is cell-to-cell mobile.
	At2g02710/PLPB	0.408	Protein TWIN LOV 1; Encodes a putative blue light receptor protein
At2g39650	At4g29780	0.853	Expression of the gene is affected by multiple stresses. Knockout and overexpression lines show no obvious phenotypes. Uncharacterized protein At4g29780; Unknown protein; BEST Arabidopsis thaliana protein match is: unknown protein (TAIR:AT5G12010.1); Has 945 Blast hits to 944 proteins in 87 species: Archae - 0; Bacteria - 0; Metazoa - 519; Fungi - 43; Plants - 365; Viruses - 0; Other Eukaryotes -…
	At4g30650	0.833	Low temperature and salt responsive protein family; Involved in response to salt stress, response to cold, hyperosmotic salinity response, defense response to fungus; Located in endomembrane system, integral to membrane; Expressed in 21 plant structures; Expressed during 13 growth stages; Contains the following InterPro domains: Uncharacterised protein family UPF0057 (InterPro:IPR000612); BEST Ar…
	At2g40140/SZF2	0.833	SALT-INDUCIBLE ZINC FINGER 2, ATSZF2, CZF1, SZF2; Zinc finger CCCH domain-containing protein 29; Involved in salt stress response. May positively modulate plant tolerance to salt stress
	At1g08510/FATB	0.833	FATB, FATTY ACYL-ACP THIOESTERASES B; Encodes an acyl-acyl carrier protein thioesterase. Hydrolyzes primarily saturated acyl-ACPs with chain lengths that vary between 8 and 18 carbons. Involved in saturated fatty acid synthesis. Nuclear-encoded, plastid-targeted globular protein that is functional as dimer. Palmitoyl-acyl carrier protein thioesterase, chloroplastic; Plays an essential role in cha…
	At3g55980/SZF1	0.825	SALT-INDUCIBLE ZINC FINGER 1, Zinc finger CCCH domain-containing protein 47; Involved in salt stress response. May positively modulate plant tolerance to salt stress
	At4g24570/DIC2	0.822	DIC2, DICARBOXYLATE CARRIER 2, Mitochondrial uncoupling protein 4; PUMPS are mitochondrial transporter proteins that create proton leaks across the inner mitochondrial membrane, thus uncoupling oxidative phosphorylation. This leads to a decrease in the efficiency of oxidative phosphorylation and an increase in heat production. May be involved in protecting plant cells against oxidative stress dam…
	At3g49530/NAC062	0.813	Transcription factor that serves as a molecular link between cold signals and pathogen resistance responses. Undergoes proteolytic processing triggered by cold-induced changes in membrane fluidity.It relocates from the plasma membrane to the nucleus in response to ER stress. NAC062 is phosphorylated by SnRK2.8 at Thr-142. NAC domain containing protein 62; Transcriptional activator activated by pr…
	At1g27730/STZ/ZAT10	0.805	SALT TOLERANCE ZINC FINGER, STZ, ZAT10; Related to Cys2/His2-type zinc-finger proteins found in higher plants. Compensated for a subset of calcineurin deficiency in yeast. Salt tolerance produced by ZAT10 appeared to be partially dependent on ENA1/PMR2, a P-type ATPase required for Li+ and Na+ efflux in yeast. The protein is localized to the nucleus, acts as a transcriptional repressor and is res…
	At4g11280/ACS6	0.79	1-aminocyclopropane-1-carboxylic acid (acc) synthase 6; 1-aminocyclopropane-1-carboxylate synthase (ACS) enzymes catalyze the conversion of S-adenosyl-L-methionine (SAM) into 1- aminocyclopropane-1-carboxylate (ACC), a direct precursor of ethylene. Involved in bacterial flagellin-induced ethylene production; Belongs to the class-I pyridoxal-phosphate-dependent aminotransferase family
	At3g50930/BCS1	0.743	Encodes a protein that is present in a homo-multimeric protein complex on the outer mitochondrial membrane and plays a role in cell death and amplifying salicylic acid signalling. The mRNA is cell-to-cell mobile. Protein HYPER-SENSITIVITY-RELATED 4; Cytochrome BC1 synthesis (BCS1); Its function is described as nucleoside-triphosphatase activity, ATPase activity, nucleotide binding, ATP binding; L…
At3g07350	At2g44500	0.868	O-fucosyltransferase family protein; May play a role in the biosynthesis of matrix polysaccharides and contribute to the biomechanics and development of the plant cell wall
	At1g76600	0.868	Uncharacterized protein At1g76600; Unknown protein; Its function is described as molecular_function unknown; Involved in N-terminal protein myristoylation; Located in nucleolus, nucleus; Expressed in 24 plant structures; Expressed during 15 growth stages; BEST Arabidopsis thaliana protein match is: unknown protein (TAIR:AT1G21010.1); Has 220 Blast hits to 220 proteins in 14 species: Archae - 0; B…
	At1g25400	0.868	Uncharacterized protein F2J7.13; Unknown protein; BEST Arabidopsis thaliana protein match is: unknown protein (TAIR:AT1G68440.1); Has 21 Blast hits to 21 proteins in 6 species: Archae - 0; Bacteria - 0; Metazoa - 0; Fungi - 0; Plants - 21; Viruses - 0; Other Eukaryotes - 0 (source: NCBI BLink)
	At1g80440/KFB20/KMD1	0.896	KELCH REPEAT F-BOX 20, KFB20, KISS ME DEADLY 1, KMD1; Encodes a member of a family of F-box proteins, called the KISS ME DEADLY (KMD) family, that targets type-B ARR proteins for degradation and is involved in the negative regulation of the cytokinin response. Also named as KFB20, a member of a group of Kelch repeat F-box proteins that negatively regulate phenylpropanoid biosynthesis by targeting…
	At2g40000/HSPRO2	0.748	ARABIDOPSIS ORTHOLOG OF SUGAR BEET HS1 PRO-1 2, Nematode resistance protein-like HSPRO2; Positive regulator of basal resistance
	At2g20670	0.722	Sugar phosphate exchanger, putative (DUF506); Protein of unknown function (DUF506) ; Located in chloroplast; Expressed in 22 plant structures; Expressed during 14 growth stages; Contains the following InterPro domains: Protein of unknown function DUF506, plant (InterPro:IPR006502); BEST Arabidopsis thaliana protein match is: Protein of unknown function (DUF506) (TAIR:AT4G32480.1); Has 375 Blast h…
	At4g37610/BT5	0.699	BTB/POZ and TAZ domain-containing protein 5; May act as a substrate-specific adapter of an E3 ubiquitin-protein ligase complex (CUL3-RBX1-BTB) which mediates the ubiquitination and subsequent proteasomal degradation of target proteins
	At5g22920/CHYR1/RZPF34	0.925	CHY ZINC-FINGER AND RING PROTEIN 1, CHYR1, RING ZINC-FINGER PROTEIN 34, RZPF34; Loss of function mutations show reduced (15%) stomatal aperture under non stress conditions. CHY-type/CTCHY-type/RING-type Zinc finger protein; Possesses E3 ubiquitin-protein ligase activity in vitro. Mediates mainly 'Lys-48'-linked polyubiquitination. Promotes abscisic acid (ABA)-induced stomatal closure, reactive ox…
	At5g19120	0.67	Eukaryotic aspartyl protease family protein; Its function is described as aspartic-type endopeptidase activity; Involved in proteolysis; Located in endomembrane system; Expressed in 24 plant structures; Expressed during 13 growth stages; Contains the following InterPro domains: Peptidase aspartic (InterPro:IPR021109), Peptidase aspartic, catalytic (InterPro:IPR009007), Peptidase A1 (InterPro:IPR0…
	At1g70290/TPS8	0.833	TPS8, TREHALOSE-6-PHOSPHATASE SYNTHASE S8; Probable alpha,alpha-trehalose-phosphate synthase [UDP-forming] 8; Encodes an enzyme putatively involved in trehalose biosynthesis. Though the protein has both trehalose-6-phosphate synthase (TPS)-like and trehalose-6-phosphate phosphatase (TPP)-like domains, neither activity has been detected in enzymatic assays nor has the protein been able to compleme…
At3g22970	At1g45688/CC1	0.967	COMPANION OF CELLULOSE SYNTHASE 1, CC1 is a plant specific gene that interacts with with the cellulose synthase complex and microtubules. It appears to play a role in localizing CESA to the membrane, microtuble dynamics , particularly during salt stress.
	At3g04760	0.952	Pentatricopeptide repeat-containing protein At3g04760, chloroplastic; Pentatricopeptide repeat (PPR-like) superfamily protein; Involved in biological_process unknown; Located in chloroplast; Expressed in 21 plant structures; Expressed during 13 growth stages; Contains the following InterPro domains: Pentatricopeptide repeat (InterPro:IPR002885); BEST Arabidopsis thaliana protein match is: Pentatr…
	At5g12110	0.903	Glutathione S-transferase, C-terminal-like;Translation elongation factor EF1B/ribosomal protein S6; EF-1-beta and EF-1-delta stimulate the exchange of GDP bound to EF-1-alpha to GTP
	At1g06460/ACD32.1	0.838	ALPHA-CRYSTALLIN DOMAIN 32.1, Peroxisomal small heat shock protein Acd31.2; ACD32.1 encodes an alpha-crystallin domain containing protein with homology to small heat shock proteins
	At5g07720/XXT3	0.715	XYLOGLUCAN XYLOSYLTRANSFERASE 3, Galactosyl transferase GMA12/MNN10 family protein; Probable xyloglucan xylosyltransferase involved in the biosynthesis of xyloglucan
	At1g04350	0.7	2-oxoglutarate (2OG) and Fe(II)-dependent oxygenase superfamily protein; Encodes a protein whose sequence is similar to 2-oxoglutarate-dependent dioxygenase; Belongs to the iron/ascorbate-dependent oxidoreductase family
	At1g69830/AMY3	0.641	ALPHA-AMYLASE-LIKE 3, Encodes a plastid-localized α-amylase. Expression is reduced in the SEX4 mutant. Loss of function mutations show normal diurnal pattern of starch accumulation/degradation. Expression follows circadian rhythms.
	At4g15560/CLA1	0.596	1-DEOXY-D-XYLULOSE 5-PHOSPHATE (DXP) SYNTHASE 1, chloroplastic; Catalyzes the acyloin condensation reaction between C atoms 2 and 3 of pyruvate and glyceraldehyde 3-phosphate to yield 1-deoxy-D-xylulose-5-phosphate (DXP). Is a limiting enzyme for plastidic isoprenoid biosynthesis and essential for chloroplast development; Belongs to the transketolase family. DXPS subfamily
	At5g63600/FLS5	0.567	FLAVONOL SYNTHASE 5; Encodes a protein whose sequence is similar to flavonol synthase; Belongs to the iron/ascorbate-dependent oxidoreductase family
	At2g01930BPC1	0.465	Protein BASIC PENTACYSTEINE1; Transcriptional regulator that specifically binds to GA- rich elements (GAGA-repeats) present in regulatory sequences of genes involved in developmental processes. Negatively regulates the homeotic gene AGL11/STK, which controls ovule primordium identity, by a cooperative binding to purine-rich elements present in the regulatory sequence leading to DNA conformational…
At4g14620	At3g18240	0.764	Ribosomal protein S24/S35, mitochondrial; Its function is described as molecular_function unknown; Involved in biological_process unknown; Located in cytosol, nucleus; Expressed in cultured cell; Contains the following InterPro domains: Ribosomal protein S24/S35, mitochondrial (InterPro:IPR019349); BEST Arabidopsis thaliana protein match is: Ribosomal protein S24/S35, mitochondrial (TAIR:AT4G2146…
	At3g26990	0.764	ENTH/VHS family protein; Its function is described as molecular_function unknown; Involved in biological_process unknown; Located in endomembrane system; Expressed in 24 plant structures; Expressed during 13 growth stages; Contains the following InterPro domains: Protein of unknown function DUF618 (InterPro:IPR006903), RNA polymerase II, large subunit, CTD (InterPro:IPR006569), ENTH/VHS (InterPro…
	At3g50040	0.764	At3g50040; Unknown protein; BEST Arabidopsis thaliana protein match is: unknown protein (TAIR:AT4G37440.2); Has 70 Blast hits to 70 proteins in 12 species: Archae - 0; Bacteria - 0; Metazoa - 0; Fungi - 0; Plants - 70; Viruses - 0; Other Eukaryotes - 0 (source: NCBI BLink)
	At3g53630	0.764	AT3g53630/F4P12_330; Unknown protein; BEST Arabidopsis thaliana protein match is: unknown protein (TAIR:AT4G18692.1); Has 42 Blast hits to 42 proteins in 10 species: Archae - 0; Bacteria - 0; Metazoa - 0; Fungi - 0; Plants - 42; Viruses - 0; Other Eukaryotes - 0 (source: NCBI BLink)
	At3g59670	0.764	Uncharacterized protein At3g59670; Unknown protein; BEST Arabidopsis thaliana protein match is: unknown protein (TAIR:AT4G37440.2); Has 77 Blast hits to 77 proteins in 14 species: Archae - 0; Bacteria - 0; Metazoa - 0; Fungi - 0; Plants - 73; Viruses - 0; Other Eukaryotes - 4 (source: NCBI BLink)
	At4g03420	0.764	Protein of unknown function (DUF789); Contains the following InterPro domains: Protein of unknown function DUF789 (InterPro:IPR008507); BEST Arabidopsis thaliana protein match is: Protein of unknown function (DUF789) (TAIR:AT1G03610.1); Has 30201 Blast hits to 17322 proteins in 780 species: Archae - 12; Bacteria - 1396; Metazoa - 17338; Fungi - 3422; Plants - 5037; Viruses - 0; Other Eukaryotes -…
	At4g14620	0.764	Protein of unknown function (DUF506) ; Contains the following InterPro domains: Protein of unknown function DUF506, plant (InterPro:IPR006502); BEST Arabidopsis thaliana protein match is: Protein of unknown function (DUF506) (TAIR:AT3G22970.1); Has 402 Blast hits to 400 proteins in 26 species: Archae - 0; Bacteria - 0; Metazoa - 0; Fungi - 0; Plants - 397; Viruses - 0; Other Eukaryotes - 5 (sourc…
	At4g21930	0.764	Protein of unknown function, DUF584, senescence regulator; Contains the following InterPro domains: Protein of unknown function DUF584 (InterPro:IPR007608); BEST Arabidopsis thaliana protein match is: Protein of unknown function, DUF584 (TAIR:AT1G61930.1); Has 321 Blast hits to 321 proteins in 21 species: Archae - 0; Bacteria - 0; Metazoa - 0; Fungi - 0; Plants - 321; Viruses - 0; Other Eukaryote…
	At5g08360	0.764	Protein of unknown function (DUF789); Contains the following InterPro domains: Protein of unknown function DUF789 (InterPro:IPR008507); BEST Arabidopsis thaliana protein match is: Protein of unknown function (DUF789) (TAIR:AT5G23380.1); Has 30201 Blast hits to 17322 proteins in 780 species: Archae - 12; Bacteria - 1396; Metazoa - 17338; Fungi - 3422; Plants - 5037; Viruses - 0; Other Eukaryotes -…
	At5g09670	0.764	Uncharacterized protein F17I14_140; Loricrin-related; BEST Arabidopsis thaliana protein match is: loricrin-related (TAIR:AT5G64550.1); Has 3115 Blast hits to 1776 proteins in 152 species: Archae - 0; Bacteria - 24; Metazoa - 1222; Fungi - 31; Plants - 508; Viruses - 3; Other Eukaryotes - 1327 (source: NCBI BLink)
	At5g14540	0.764	Basic salivary proline-rich-like protein (DUF1421); Its function is described as molecular_function unknown; Involved in biological_process unknown; Located in cellular_component unknown; Expressed in 23 plant structures; Expressed during 13 growth stages; Contains the following InterPro domains: Ubiquitin-associated/translation elongation factor EF1B, N-terminal, eukaryote (InterPro:IPR015940), …
At4g32480	At4g26270/PFK3	0.831	ATP-dependent 6-phosphofructokinase 3; Catalyzes the phosphorylation of D-fructose 6-phosphate to fructose 1,6-bisphosphate by ATP, the first committing step of glycolysis; Belongs to the phosphofructokinase type A (PFKA) family. PPi-dependent PFK group II subfamily. Atypical ATP- dependent clade "X" sub-subfamily
	At2g22480/PFK5	0.563	ATP-dependent 6-phosphofructokinase 5, chloroplastic; Catalyzes the phosphorylation of D-fructose 6-phosphate to fructose 1,6-bisphosphate by ATP, the first committing step of glycolysis; Belongs to the phosphofructokinase type A (PFKA) family. PPi-dependent PFK group II subfamily. Atypical ATP- dependent clade "X" sub-subfamily
	At1g20950	0.553	Pyrophosphate--fructose 6-phosphate 1-phosphotransferase subunit alpha 1; Regulatory subunit of pyrophosphate--fructose 6- phosphate 1-phosphotransferase; Belongs to the phosphofructokinase type A (PFKA) family. PPi-dependent PFK group II subfamily. Clade "Long" sub- subfamily
	At1g76550	0.55	Pyrophosphate--fructose 6-phosphate 1-phosphotransferase subunit alpha 2; Regulatory subunit of pyrophosphate--fructose 6- phosphate 1-phosphotransferase; Belongs to the phosphofructokinase type A (PFKA) family. PPi-dependent PFK group II subfamily. Clade "Long" sub- subfamily
	At1g12000	0.53	Pyrophosphate--fructose 6-phosphate 1-phosphotransferase subunit beta 1; Catalytic subunit of pyrophosphate--fructose 6-phosphate 1-phosphotransferase. Catalyzes the phosphorylation of D-fructose 6-phosphate, the first committing step of glycolysis. Uses inorganic phosphate (PPi) as phosphoryl donor instead of ATP like common ATP-dependent phosphofructokinases (ATP-PFKs), which renders the reacti…
	At4g04040/MEE51	0.529	MATERNAL EFFECT EMBRYO ARREST 51, Pyrophosphate--fructose 6-phosphate 1-phosphotransferase subunit beta 2; Catalytic subunit of pyrophosphate--fructose 6-phosphate 1-phosphotransferase. Catalyzes the phosphorylation of D-fructose 6-phosphate, the first committing step of glycolysis. Uses inorganic phosphate (PPi) as phosphoryl donor instead of ATP like common ATP-dependent phosphofructokinases (A…
	At5g47810/PFK2	0.499	ATP-dependent 6-phosphofructokinase 2; Catalyzes the phosphorylation of D-fructose 6-phosphate to fructose 1,6-bisphosphate by ATP, the first committing step of glycolysis; Belongs to the phosphofructokinase type A (PFKA) family. PPi-dependent PFK group II subfamily. Atypical ATP- dependent clade "X" sub-subfamily
	At1g07110/F2KP	0.414	6-phosphofructo-2-kinase/fructose-2,6-bisphosphatase; Synthesis and degradation of fructose 2,6-bisphosphate. Regulates carbon partitioning between sucrose versus starch during the diurnal cycle; In the C-terminal section; belongs to the phosphoglycerate mutase family

## Sheet: AtPIN
Bait	Prey	FSW	TAIR10 annotation
At1g77145	At3g15010	0.381	RNA-binding (RRM/RBD/RNP motifs) family protein
	At2g46130	0.64	ATWRKY43, member of WRKY Transcription Factor; Group II-c
	At4g23810	0.512	ATWRKY53, member of WRKY Transcription Factor; Group III
	At1g09840	0.1693	ATHIR1, ATSK41, SHAGGY-LIKE PROTEIN KINASE 41, SK41, shaggy-like protein kinase 41
	At3g43810	0.1095	ATCAM7, CALMODULIN 7, CAM7, Z-BOX BINDING FACTOR 3, ZBF3, EF hand domain protein encodes a calmodulin. Can functionally complement a yeast CaM mutant.
	At1g66410	0.1222	ACAM-4, CALMODULIN 4, CAM4
	At3g51920	0.1473	ATCML9, CALMODULIN 9, CALMODULIN LIKE PROTEIN 9, CAM9, CML9, encodes a divergent member of calmodulin, which is an EF-hand family of Ca2+-binding proteins. This gene is expressed in leaves, flowers and siliques. The gene functionally complements yeast calmodulin 1 (CAM1) but only when selected against the plasmid harboring wild-type yeast sequences. Also the protein does not form formed a complex…
	At2g41090	0.1187	CALMODULIN LIKE 10, CML10, Encodes a cytoplasmic, calcium binding calmodulin variant. CML10 interacts with phosphomannomutase (PMM)in vivo and increases its activity thereby affecting ascorbic acid biosynthesis. Its expression is induced by oxidative and other stress. The mRNA is cell-to-cell mobile.
	At1g68380	0.5689	Core-2/I-branching beta-1,6-N-acetylglucosaminyltransferase family protein
	At1g27690	0.2105	BDR3, BOUNDARY OF ROP DOMAIN3, lipase, putative (DUF620)
	At2g30980	0.3462	A. THALIANA SHAGGY-LIKE KINASE GROUP 2 2, ASKDZETA, ATSK2-2, ATSK23, BIL1, BIN2-LIKE 1, SHAGGY-LIKE PROTEIN KINASE 23, SHAGGY-RELATED PROTEIN KINASE DZETA, SKDZETA, Encodes a GSK3-like protein kinase. This protein can interact with the BZR1 protein involved in brassinosteroid-mediated signaling in a Y2H assay and promotes BZR1 phosphorylation in protoplasts.
	At4g39540	0.64	ATSK2, SHIKIMATE KINASE 2, SK2, Encodes a shikimate kinase. Its transcripts appear to be expressed in vegetative tissues and developing embryos. SK2 transcript levels rise in response to Phytophthora infestans spores. SK2 is believed to be localized to the chloroplast.
	At4g34380	0.512	Transducin/WD40 repeat-like superfamily protein
	At5g66790	0.5689	Protein kinase superfamily protein
	At5g21274	0.1366	ACAM-6, CALMODULIN 6, CAM6, Encodes a calmodulin isoform. Expressed in leaves.
	At4g14640	0.1945	ATCML8, CALMODULIN 8, CALMODULIN-LIKE 8, CAM8, CML8, encodes a divergent member of calmodulin, which is an EF-hand family of Ca2+-binding proteins. This gene is expressed in leaves, flowers and siliques. The gene functionally complements yeast calmodulin 1 (CAM1). Also the protein does not form formed a complex with a basic amphiphilic helical peptide in the presence of Ca2+ in vitro. Authors sug…
At2g33820	At3g54550	0.0745	DNA-directed RNA polymerase subunit beta-beta protein, putative (DUF506)
https://atpin.bioinfoguy.net/cgi-bin/atpin.pl
AtPIN: Arabidopsis thaliana Protein Interaction Network
https://doi.org/10.1186/1471-2105-10-454

## Sheet: AI-1
Bait	Prey	TAIR10 annotation
At1g77145	At2g41090	CALMODULIN LIKE 10, CML10, Encodes a cytoplasmic, calcium binding calmodulin variant. CML10 interacts with phosphomannomutase (PMM)in vivo and increases its activity thereby affecting ascorbic acid biosynthesis. Its expression is induced by oxidative and other stress. The mRNA is cell-to-cell mobile.
	At2g41100	ARABIDOPSIS THALIANA CALMODULIN LIKE 4, ATCAL4, CALMODULIN-LIKE 12, CML12, TCH3, TOUCH 3, encodes a calmodulin-like protein, with six potential calcium binding domains. Calcium binding shown by Ca(2+)-specific shift in electrophoretic mobility. Expression induced by touch and darkness. Expression may also be developmentally controlled. Expression in growing regions of roots, vascular tissue, root…
	At3g43810	ATCAM7, CALMODULIN 7, CAM7, Z-BOX BINDING FACTOR 3, ZBF3, EF hand domain protein encodes a calmodulin. Can functionally complement a yeast CaM mutant.
	At3g51920	ATCML9, CALMODULIN 9, CALMODULIN LIKE PROTEIN 9, CAM9, CML9, encodes a divergent member of calmodulin, which is an EF-hand family of Ca2+-binding proteins. This gene is expressed in leaves, flowers and siliques. The gene functionally complements yeast calmodulin 1 (CAM1) but only when selected against the plasmid harboring wild-type yeast sequences. Also the protein does not form formed a complex…
	At4g14640	ATCML8, CALMODULIN 8, CALMODULIN-LIKE 8, CAM8, CML8, encodes a divergent member of calmodulin, which is an EF-hand family of Ca2+-binding proteins. This gene is expressed in leaves, flowers and siliques. The gene functionally complements yeast calmodulin 1 (CAM1). Also the protein does not form formed a complex with a basic amphiphilic helical peptide in the presence of Ca2+ in vitro. Authors sug…
	At5g21274	ACAM-6, CALMODULIN 6, CAM6, Encodes a calmodulin isoform. Expressed in leaves.
	At1g66410	ACAM-4, CALMODULIN 4, CAM4
At3g07350	At3g48150	ANAPHASE-PROMOTING COMPLEX SUBUNIT 8, APC8, CDC23, anaphase-promoting complex or cyclosome subunit
	At1g52240	ATROPGEF11, PHYTOCHROME INTERACTING ROPGEF 1, PIRF1, ROP (RHO OF PLANTS) GUANINE NUCLEOTIDE EXCHANGE FACTOR 11, ROPGEF11, Encodes a member of KPP-like gene family, homolog of KPP (kinase partner protein) gene in tomato. Also a member of the RopGEF (guanine nucleotide exchange factor) family, containing the novel PRONE domain (plant-specific Rop nucleotide exchanger), which is exclusively active t…
Arabidopsis Interactome -1
Evidence for Network Evolution in an Arabidopsis Interactome Map
DOI: 10.1126/science.1203877
