# Supplementary material for: Genome-Wide Identification and Transcriptional Analysis of Arabidopsis DUF506 Gene Family
Source: Int J Mol Sci. 2021 Oct 23;22(21):11442. doi: 10.3390/ijms222111442 (PMC8583954; doi:10.3390/ijms222111442)
Supplement: Supplementary file 1 [file ijms-22-11442-s001.zip › Supplemental Table S7. Calmodulin binding motifs in AtDUF506.xlsx]

## Sheet: Sheet1
	Suplemental table S7. Calmodulin binding motif in AtDUF506 protein
	Gene ID	Type of motif	Signature sequence	Identified motif in AtDUF506
	At1g12030	1 - 10	(FILVW)xxxxxxxx(FILVW)	123 - FDAGLCKSRW - 132
	At1g62420	1 - 12	(FILVW)xxxxxxxxxx(FILVW)	11 - IESAFNVAAARV - 22
	At1g77145	1 - 12	(FILVW)xxxxxxxxxx(FILVW)	169 - VATEGRLRRVVSLV - 182
	At1g77160	1 - 8 - 14	(FILVW)xxxxxx(FAILVW)xxxxx(FILVW)	173 - FVATEGRLRRVVSL - 186
	At2g20670	Basic 1 - 5 - 10	(FAILVW)xxxx(FILV)xxxx(FILVW)	92 - ALKQVKSKGL - 101
	At2g38820	1 - 12	(FILVW)xxxxxxxxxx(FILVW)	245 - IVLICKAAKQSL - 256
	At2g39650	Basic 1 - 8 - 14	(RK)xxxxxx(FAILVW)xxxxx(FILVW)	119 - RLSGYDAAVCSARW - 132
	At3g07350	1 - 5 - 10	(FILVW)xxxx(FAILVW)xxxx(FILVW)	229 - LVCDAARISL - 238
	At3g22970	1 - 12	(FILVW)xxxxxxxxxx(FILVW)	254 - VFLISEAAKQSL - 265
	At3g54550	1 - 5 - 10	(FILVW)xxxx(FAILVW)xxxx(FILVW)	236 - FLSKAAKTSF - 245
	At4g14620	1 - 14	(FILVW)xxxxxxxxxxxx(FILVW)	219 - VGKSDRIRQIVSIV - 232
	At4g32480	Basic 1 - 5 - 10	(FAILVW)xxxx(FILV)xxxx(FILVW)	91 - ALKVVRSKGL - 100
