# Supplementary material for: Genome-Wide Identification and Transcriptional Analysis of Arabidopsis DUF506 Gene Family
Source: Int J Mol Sci. 2021 Oct 23;22(21):11442. doi: 10.3390/ijms222111442 (PMC8583954; doi:10.3390/ijms222111442)
Supplement: Supplementary file 1 [file ijms-22-11442-s001.zip › Supplemental Table S8. Primer sequences used in this study.xlsx]

## Sheet: Sheet1
	Table S8. Primer sequences used in this study
	GeneID	Primer name	Sequence (5' to 3')	Purpose
	AT1G12030	DUF506-1-FP	CTTTGGGATCTGGTCGAATCTT	qRT-PCR analysis
		DUF506-1-RP	CCTCTCCTTCACATCTTCGTAATC
	AT1G62420 (RXR3)	DUF506-2-FP	AAGCTAAGTGGTTCGGTTTCT
		DUF506-2-RP	ACCCTTAAACGCAGTCGTATC
	AT1G77145	DUF506-3-FP	CGTGAAGGGTGTAGAGTGTTTAG
		DUF506-3-RP	CACACGTTTCAGCTTGCTTAC
	AT1G77160	DUF506-4-FP	TGGGAGAAGAAGATTTCGAGAAG
		DUF506-4-RP	AGAGTGATAAGAGCCTTTGAAGAA
	AT2G20670	DUF506-5-FP	GATGGTCTCTTAGGTGGTTTCTC
		DUF506-5-RP	AACACTCATGACTCACCCTAATC
	AT2G38820	DUF506-6-FP	CGATGAGACAGATGCCGAAA
		DUF506-6-RP	CTCAACATCTGAGCCGGTAAA
	AT2G39650	DUF506-7-FP	GCTAGAGCTGTGGATTCTTACC
		DUF506-7-RP	ATTTCGCTGCATCAACCATTAC
	AT3G22970	DUF506-8-FP	CTCTTCTTATACGCGAGCTTCC
		DUF506-8-RP	TCTACACTATCCACCTCCTTCTC
	AT3G07350	DUF506-9-FP	ATCCACTTGCAGAAGAGGTTAG
		DUF506-9-RP	CGTCGTCTTCGTAGTCTTCAAT
	AT3G25240 (RXR1)	DUF506-10-FP	GGCGGAGAAGCTCTTACTTAC
		DUF506-10-RP	ACCCTAAAGATCGGCAACTAAC
	AT3G54550	DUF506-11-FP	GTTCCAAAGTCCAGCCTATCA
		DUF506-11-RP	CGATGAATCTACACCGGCTAAG
	AT4G14620	DUF506-12-FP	CTGAACCGGAGCTAGATTCTTC
		DUF506-12-RP	GCCACGTCATCATCATCTCTAC
	AT4G32480	DUF506-13-FP	CTGGCTATGATTGCGTCATTTC
		DUF506-13-RP	GTCCACGACCTCCAAGTATTC
	AT1G13440 (GAPDH)	GAPDH-FP	TTGGTGACAACAGGTCAAGCA
		GAPDH-RP	AAACTTGTCGCTCAATGCAATC
